# Supplementary material for: Potential Nutraceutical Properties of Leaves from Several Commonly Cultivated Plants
Source: MDPI journal article supplement (doi:10.3390/biom10111556), 2020-11-15
Supplement: s1 [file s1]

**Supplementary Table S1:** Reported phytochemicals with anti-cholinergic activity.

| Sr. | Plant Species              | Common Name     | Example Anticholinergic Compounds                                                                                                                                                                         |
|-----|----------------------------|-----------------|-----------------------------------------------------------------------------------------------------------------------------------------------------------------------------------------------------------|
| 1   | <i>Citrus limon</i>        | Lemon           | Limonene, 1,8-cineole, linalool, terpinen-4-ol, $\alpha$ -terpinene, carvone, naringenin, <i>p</i> -cymene [1]                                                                                            |
| 2   | <i>Lawsonia inermis</i>    | Henna           | Hexane, chloroform, ethanolic and methanolic extracts [2,3]                                                                                                                                               |
| 3   | <i>Eucalyptus globulus</i> | Eucalyptus      | 1,8-Cineole, $\alpha$ -terpinene, carvone, limonene, linalool, menthol, naringenin, <i>p</i> -cymene, terpinen-4-ol, viridiflorol [1]                                                                     |
| 4   | <i>Ocimum basilicum</i>    | Basil           | 1,8-Cineole, $\alpha$ -terpinene, carvone, elemol, limonene, linalool, menthol, menthone, <i>p</i> -cymene, terpinen-4-ol [1]                                                                             |
| 5   | <i>Citrus reticulata</i>   | Mandarin        | Naringenin, 1,8-cineole, $\alpha$ -terpinene, carvone, limonene, elemol, linalool, <i>p</i> -cymene, terpinen-4-ol [1]                                                                                    |
| 6   | <i>Mentha spicata</i>      | Mint            | Menthol, menthone, (+)-piperitenone-oxide, (+)-pulegone, 1,8-cineole, $\alpha$ -terpinene, carvone, elemol, limonene, linalool, <i>p</i> -cymene, piperitenone, pulegone, terpinen-4-ol, viridiflorol [1] |
| 7   | <i>Bombax ceiba</i>        | Red silk-cotton | Ethanol, hexane and methanolic extracts [4,5]                                                                                                                                                             |

#### References

1. Duke, J.A. *Dr. Duke's Phytochemical and Ethnobotanical Databases*. 2016 (accessed 28/09/2020); Available from: <https://phytochem.nal.usda.gov/phytochem/search/list>.
2. Rajesh, V., et al., *Memory enhancing activity of Lawsonia inermis Linn. leaves against scopolamine induced memory impairment in Swiss albino mice*. *Oriental Pharmacy and Experimental Medicine*, 2017. **17**(2): p. 127-142.
3. Chaibi, R., et al., *Assessment of antioxidant, anti-inflammatory, anti-cholinesterase and cytotoxic activities of Henna (Lawsonia inermis) flowers*. *J Nat Prod*, 2015. **8**: p. 85-92.

4. Sinha, S., et al., *Neuroprotective potential of Cucurbita maxima Duchesne ex Poir, Caesalpinia bunduc (L.) Roxb and Bombax ceiba Linn extracts*. South African journal of botany, 2019. **120**: p. 319-325.
5. Mostafa, N.M.,  *$\beta$ -Amyrin rich Bombax ceiba leaf extract with potential neuroprotective activity against scopolamine-induced memory impairment in rats*. Records of Natural Products, 2018. **12**(5): p. 480.
